# Supplementary material
Source: publisher figshare collection journal article supplement (https://sage.figshare.com/ndownloader/files/21142566)

## **Supplemental Materials for**

### **International comparison of peritoneal dialysis prescriptions from the Peritoneal Dialysis Outcomes and Practice Patterns Study (PDOPPS)**

Angela Yee-Moon Wang<sup>1</sup>, Junhui Zhao<sup>2</sup>, Brian Bieber<sup>2</sup>, Talerngsak Kanjanabuch<sup>3</sup>,  
Martin Wilkie<sup>4</sup>, Mark Marshall<sup>5</sup>, Hideki Kawanishi<sup>6</sup>, Jeffrey Perl<sup>7</sup>, Simon Davies<sup>8</sup>, on  
behalf of PDOPPS dialysis prescription and fluid management working group

Dr Angela Yee-Moon Wang,  
Department of Medicine  
Queen Mary Hospital  
University of Hong Kong  
102 Pok Fu Lam Road  
Hong Kong  
Tel: 852-22554949  
Fax: 852-22555411  
Email: aymwang@hku.hk

Supplemental Table 1: Patient characteristics by country and by PD modality

|                                           | A/NZ       |            | Canada     |            | Japan      |            | Thailand   |            | UK         |            | US         |            |
|-------------------------------------------|------------|------------|------------|------------|------------|------------|------------|------------|------------|------------|------------|------------|
|                                           | APD        | CAPD       |
| Number of patients                        | 213        | 111        | 269        | 107        | 195        | 337        | 26         | 521        | 149        | 72         | 2199       | 458        |
| Patient age, years                        | 62.5(13.7) | 67.5(13.3) | 61.2(15.2) | 62.3(13.5) | 62.0(13.5) | 66.6(12.5) | 64.0(15.8) | 55.6(13.5) | 61.4(15.9) | 64.8(13.4) | 57.3(15.2) | 57.0(14.9) |
| Female, %                                 | 35%        | 39%        | 42%        | 41%        | 37%        | 41%        | 39%        | 50%        | 36%        | 31%        | 45%        | 49%        |
| Black race, %                             | 0%         | 0%         | 6%         | 2%         | 0%         | 0%         | 0%         | 0%         | 3%         | 6%         | 27%        | 28%        |
| Time on PD, years                         | 1.98(1.77) | 1.81(2.25) | 2.23(2.07) | 2.92(3.75) | 2.77(2.47) | 2.70(2.50) | 2.27(2.20) | 2.20(1.85) | 1.95(2.38) | 1.78(2.20) | 1.42(1.55) | 1.42(1.75) |
| Time on ESRD, years                       | 2.41(2.59) | 2.28(3.04) | 3.17(3.55) | 3.19(3.98) | 2.93(2.47) | 3.14(3.74) | 2.98(2.66) | 2.46(2.01) | 2.68(3.84) | 3.02(4.67) | 3.00(3.20) | 2.95(3.81) |
| Prior HD experience, %                    | 25%        | 22%        | 21%        | 25%        | 14%        | 21%        | 25%        | 36%        | 18%        | 17%        | 33%        | 45%        |
| Body mass index, kg/m <sup>2</sup>        | 27.1(4.8)  | 28.2(5.0)  | 26.8(5.7)  | 27.2(5.3)  | 22.9(3.4)  | 22.9(3.5)  | 22.7(4.1)  | 22.6(4.0)  | 25.7(4.9)  | 27.7(5.5)  | 29.2(6.2)  | 29.6(6.8)  |
| Body surface area, m <sup>2</sup>         | 1.87(0.26) | 1.88(0.24) | 1.88(0.28) | 1.88(0.23) | 1.63(0.22) | 1.60(0.20) | 1.63(0.25) | 1.59(0.19) | 1.88(0.23) | 1.96(0.24) | 1.98(0.29) | 1.98(0.29) |
| Caregiver(s) involved in PD exchanges*, % | 18%        | 17%        | 18%        | 11%        | 13%        | 13%        | 89%        | 55%        | 29%        | 14%        | 18%        | 12%        |
| Comorbidity condition, %                  |            |            |            |            |            |            |            |            |            |            |            |            |
| Coronary artery disease                   | 29%        | 39%        | 28%        | 33%        | 14%        | 18%        | 19%        | 8%         | 28%        | 36%        | 21%        | 19%        |
| Cancer (non-skin)                         | 18%        | 17%        | 13%        | 11%        | 9%         | 10%        | 0%         | 2%         | 10%        | 18%        | 8%         | 10%        |
| Other cardiovascular diseases             | 16%        | 18%        | 16%        | 19%        | 15%        | 15%        | 23%        | 6%         | 20%        | 13%        | 12%        | 10%        |
| Cerebrovascular disease                   | 12%        | 8%         | 9%         | 11%        | 15%        | 15%        | 19%        | 5%         | 8%         | 10%        | 6%         | 6%         |
| Congestive heart failure                  | 5%         | 8%         | 11%        | 10%        | 18%        | 19%        | 19%        | 13%        | 5%         | 3%         | 14%        | 15%        |
| Diabetes                                  | 39%        | 54%        | 45%        | 46%        | 34%        | 39%        | 42%        | 48%        | 20%        | 36%        | 52%        | 51%        |
| Gastrointestinal bleeding                 | 1%         | 2%         | 5%         | 2%         | 3%         | 2%         | 4%         | 2%         | 3%         | 0%         | 2%         | 1%         |
| Hypertension                              | 89%        | 90%        | 89%        | 94%        | 96%        | 93%        | 92%        | 90%        | 72%        | 70%        | 88%        | 90%        |
| Lung disease                              | 8%         | 2%         | 7%         | 8%         | 5%         | 3%         | 4%         | 1%         | 3%         | 6%         | 5%         | 6%         |
| Neurologic disease                        | 5%         | 12%        | 6%         | 7%         | 8%         | 7%         | 8%         | 3%         | 1%         | 6%         | 3%         | 5%         |
| Psychiatric disorder                      | 10%        | 12%        | 12%        | 21%        | 5%         | 2%         | 4%         | 0%         | 7%         | 7%         | 22%        | 20%        |
| Peripheral vascular disease               | 19%        | 31%        | 15%        | 21%        | 6%         | 8%         | 8%         | 2%         | 13%        | 18%        | 16%        | 14%        |
| Recurrent cellulitis/gangrene             | 1%         | 4%         | 2%         | 3%         | 0%         | 1%         | 0%         | 0%         | 0%         | 1%         | 2%         | 1%         |

\*Data not available in US LDOs.

Supplement Table 2. Measures of dialysis and residual renal urea clearance and PD solutions type by country

|                                                     | A/NZ       | Canada     | Japan      | Thailand   | UK         | US         |
|-----------------------------------------------------|------------|------------|------------|------------|------------|------------|
| Number of patients                                  | 324        | 376        | 532        | 547        | 221        | 2657       |
| Total Kt/V urea                                     | 2.13(0.82) | 1.89(0.93) | 1.89(0.71) | 2.28(0.90) | 2.26(0.66) | 2.30(0.63) |
| Residual Kt/V urea                                  | 0.87(0.79) | 0.67(0.69) | 0.78(0.76) | 0.53(0.79) | 1.04(0.73) | 0.77(0.80) |
| Peritoneal Kt/V urea                                | 1.25(0.52) | 1.21(0.58) | 1.14(0.46) | 1.74(0.62) | 1.22(0.54) | 1.54(0.51) |
| 24 hour urine volume, L                             | 0.87(0.69) | 0.85(0.65) | 0.80(0.63) | 0.52(0.63) | 1.19(0.79) | 0.75(0.75) |
| 24 hour urine volume per BSA, L/1.73 m <sup>2</sup> | 0.79(0.64) | 0.78(0.60) | 0.86(0.65) | 0.59(0.68) | 1.01(0.69) | 0.67(0.66) |
| Anuric <sup>a</sup>                                 | 9%/19%     | 15%/25%    | 7%/37%     | 28%/75%    | 6%/30%     | 23%/24%    |
| PD solution type <sup>b</sup>                       |            |            |            |            |            |            |
| Icodextrin                                          | 47%        | 58%        | 43%        | 1%         | 58%        | 23%        |
| Nutrineal                                           | 0%         | 3%         | 0%         | 0%         | 2%         | 0%         |
| Calcium ≥3.5 mEq/L                                  | 9%         | 20%        | 40%        | 18%        | 15%        | 44%        |
| Neutral pH low GDP                                  | 28%        | 10%        | 26%        | 0%         | 27%        | 0%         |
| PD solution glucose concentration <sup>b</sup>      |            |            |            |            |            |            |
| Without any 2.27% or 3.86% use                      | 17%        | 22%        | 68%        | 73%        | 52%        | 4%         |
| Use of 2.27% but not 3.86%                          | 77%        | 66%        | 32%        | 19%        | 47%        | 51%        |
| Use of any 3.86%                                    | 6%         | 12%        | 0%         | 9%         | 1%         | 45%        |

a. The first number assumes the anuric status of patients missing urine volume data is unknown and excludes these patients from the anuric % / Second number assumes patients missing urine volume data are anuric in order to account for the potential practice in some countries/facilities whereby urine volume is not reported for patients known to be anuric

b. PD solution type only provided by non-LDOs in the US

Abbreviations: BSA, body surface area; Kt/V, urea clearance; PD, peritoneal dialysis; UK, United Kingdom, US, United States

Supplement Table 3. Prescription pattern and residual kidney function by incident patients vs. prevalent patients.

|                                                               | <b>Prevalent<br/>patients<br/>(n=4283)</b> | <b>Incident<br/>patients<sup>a</sup><br/>(n=374)</b> |
|---------------------------------------------------------------|--------------------------------------------|------------------------------------------------------|
| PD modality                                                   |                                            |                                                      |
| CAPD                                                          | 34%                                        | 46%                                                  |
| APD                                                           | 67%                                        | 54%                                                  |
| 24 hour urine volume per BSA, L/1.73 m <sup>2</sup>           | 0.56[0.13,1.07]                            | 0.86[0.40,1.32]                                      |
| PD solution type <sup>b</sup>                                 |                                            |                                                      |
| Icodextrin                                                    | 35%                                        | 28%                                                  |
| Nutrineal                                                     | 1%                                         | 0%                                                   |
| Calcium ≥3.5 mEq/L                                            | 27%                                        | 30%                                                  |
| BioCompatible                                                 | 28%                                        | 30%                                                  |
| PD solution glucose concentration                             |                                            |                                                      |
| Use of 2.27% but not 3.86%                                    | 46%                                        | 42%                                                  |
| Without any 2.27% or 3.86% use                                | 39%                                        | 48%                                                  |
| Use of any 3.86%                                              | 15%                                        | 10%                                                  |
| <b>CAPD patients</b>                                          |                                            |                                                      |
| Number of exchanges, including the long or overnight exchange |                                            |                                                      |
| ≤3                                                            | 23%                                        | 24%                                                  |
| 4                                                             | 71%                                        | 72%                                                  |
| ≥5                                                            | 6%                                         | 4%                                                   |
| Prescribed total volume, L                                    | 7.1(2.4)                                   | 6.6(2.3)                                             |
| <b>APD patients</b>                                           |                                            |                                                      |
| Total Number of Cycles                                        |                                            |                                                      |
| ≤3                                                            | 23%                                        | 24%                                                  |
| 4                                                             | 71%                                        | 72%                                                  |
| 5                                                             | 32%                                        | 32%                                                  |
| ≥6                                                            | 16%                                        | 6%                                                   |
| Prescribed total volume, L                                    | 7.5(5.2)                                   | 7.6(4.7)                                             |

<sup>a.</sup> < 4 months on PD at study enrollment

<sup>b.</sup> PD solution type only provided by non-LDOs in the US

Abbreviations: BSA, body surface area. CAPD, continuous ambulatory peritoneal dialysis. APD, automated peritoneal dialysis.

Supplemental Figure 1.

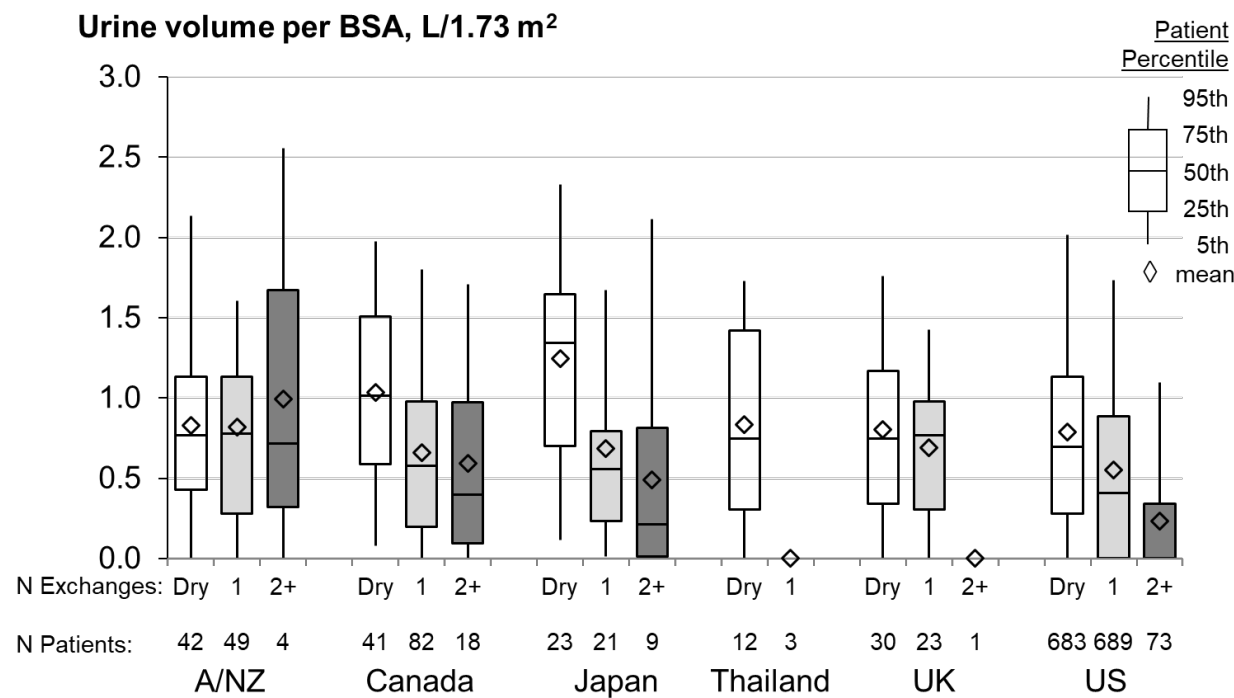

Supplemental Figure 2.

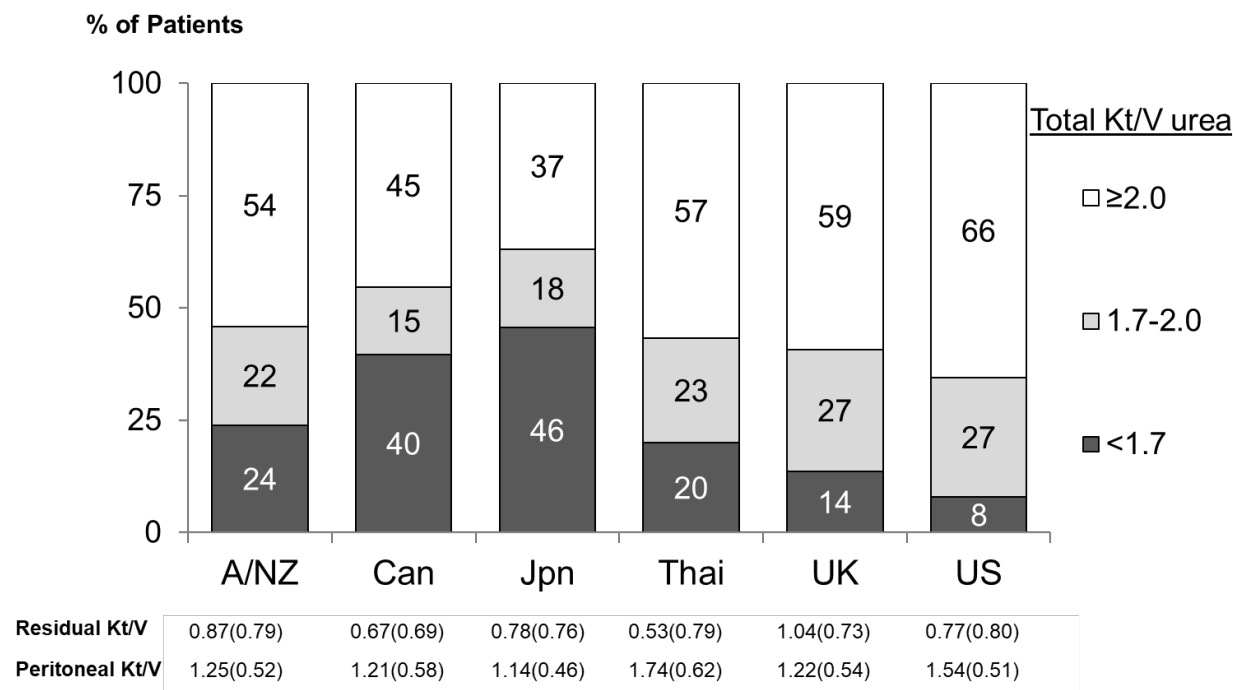

Supplement: Supplementary file 1 [file 21142566]
